# Supplementary material for: New synthesis of a porous Si/TiO2 photocatalyst: testing its efficiency and stability under visible light irradiation
Source: Royal Society of Chemistry journal article supplement (doi:10.1039/b517744h), 2006-04-28

**Electronic Supplementary Information**  
**for**  
**New synthesis of a Porous Si / TiO<sub>2</sub> photocatalyst: testing its efficiency and stability under visible light irradiation**

**Qingping Wu, Danzhen Li\*, Zhixin Chen and Xianzhi Fu**

**Fig. S1.** SEM image of porous silicon. The nanoparticles and mesopore can be seen from the surface of porous silicon.

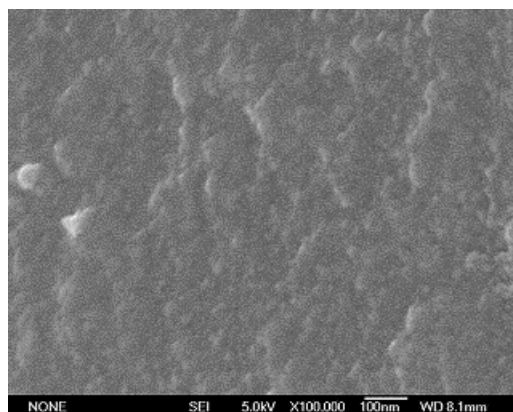

**Fig. S2** Degradation of RhB with PS / TiO<sub>2</sub> (50 mol% PS) in dark. There are almost no variance after 40 minutes which can be seen from the figure.

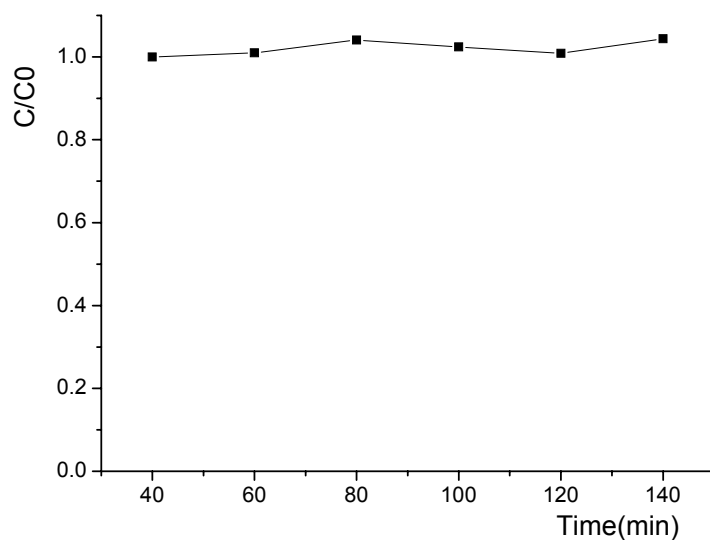

**Fig. S3.** X-ray powder diffraction patterns, (a) PS / TiO<sub>2</sub> (50 mol% PS) (b) self-made TiO<sub>2</sub> (c) PS.

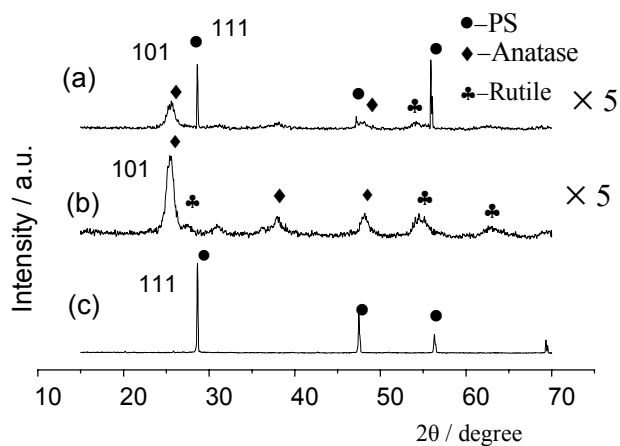

**Fig. S4.** UV-Vis reflection spectra of different photocatalysts, (a) TiO<sub>2</sub> (b) PS / TiO<sub>2</sub> (50% PS) composite. The adsorption of visible light ( from 400 nm to 800 nm) to PS / TiO<sub>2</sub> composite are clearly much more than TiO<sub>2</sub> itself

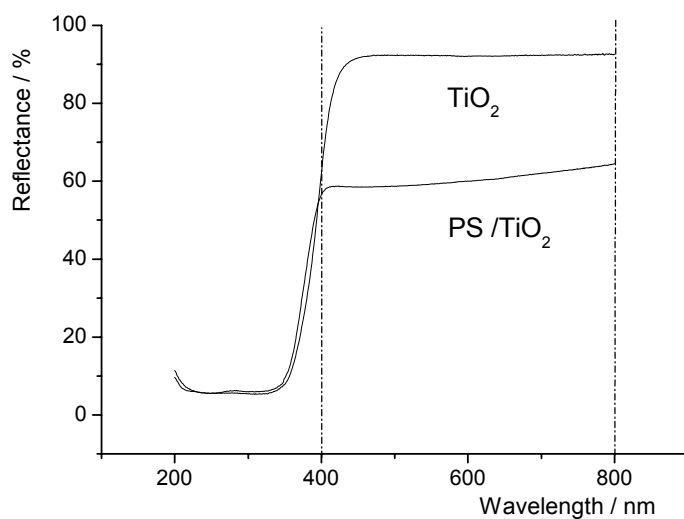

**Fig. S5.** The influence of  $\text{H}_2\text{O}_2$  in photocatalytic degradation of RhB on PS /  $\text{TiO}_2$  composite in aqueous solution. (a) without  $\text{H}_2\text{O}_2$  (b) with 0.2 ml  $\text{H}_2\text{O}_2$ . When the experiment is conducted in dark, there is almost no degradation can be found from the figure. Meanwhile, no variance of wavelength can be detected. However, a remarkable decrease of concentration of RhB and great wavelength shift can be observed during visible irradiation. Especially, The activity of compostie was obviously increased with only a little of  $\text{H}_2\text{O}_2$ .

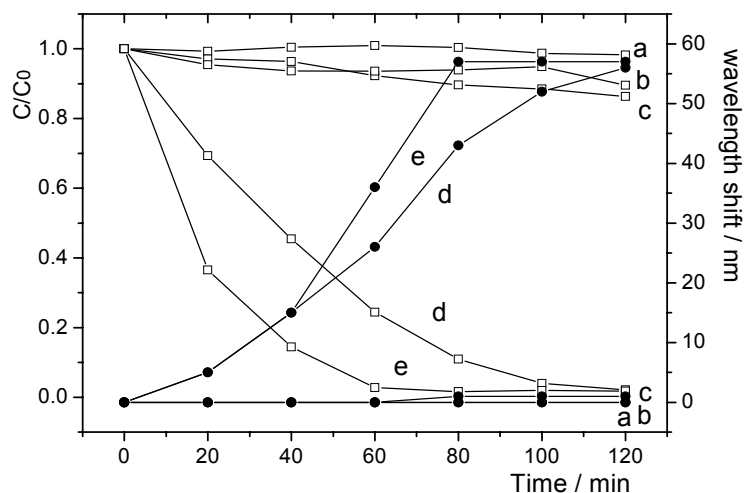

a, without any catalyst under visible light b, PS /  $\text{TiO}_2$  (50% PS) composite in dark c, 0.1ml  $\text{H}_2\text{O}_2$  under visible light d, PS /  $\text{TiO}_2$  (50% PS) composite under visible light e, PS /  $\text{TiO}_2$  (50% PS) + 0.1ml  $\text{H}_2\text{O}_2$  under visible light. The solid symbols are the results of wavelength.

**Scheme S1.** Proposed mechanism for photocatalytic degradation of Rhodamine B in aqueous solution.<sup>8, 15</sup>

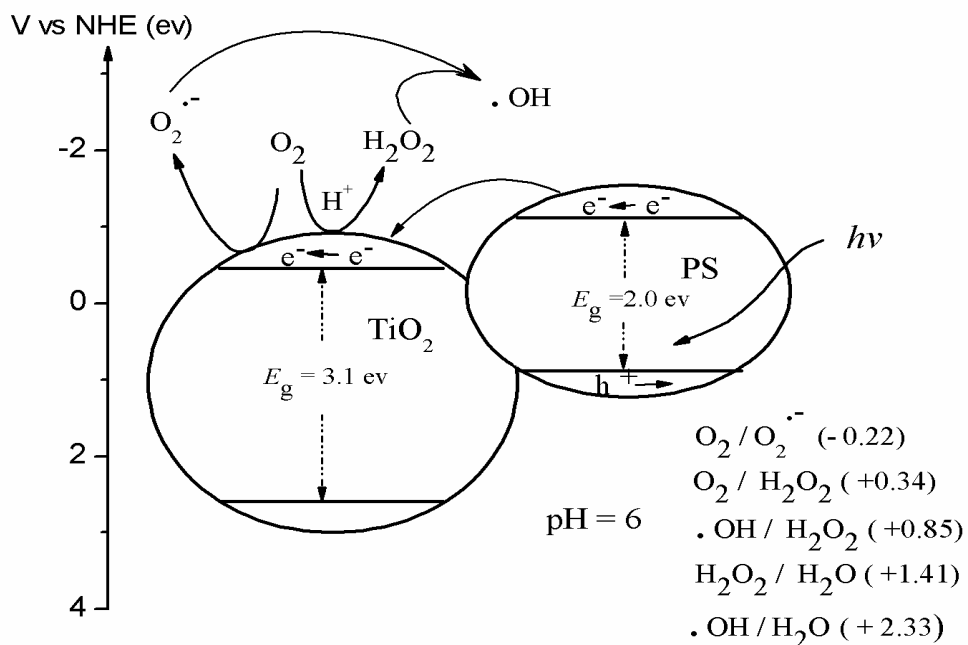

Fig. S6. Mass spectra recorded in the positive ion mode of RhB aqueous solution after photodegradation.

PS/TiO<sub>2</sub>-1-1-400 □-120min

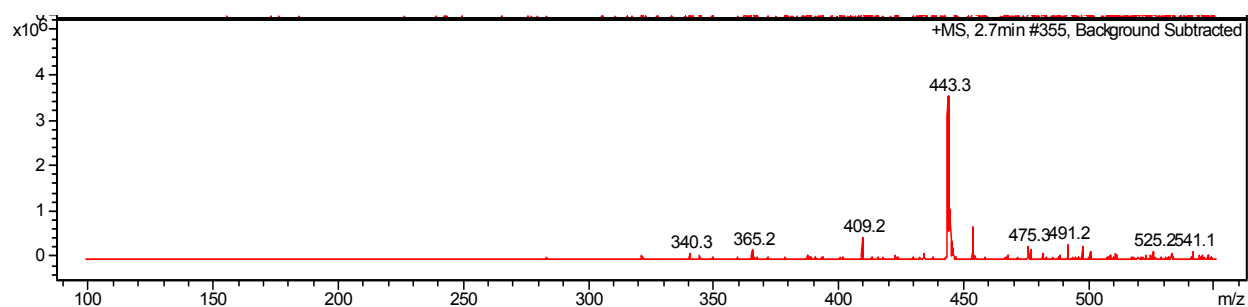

RhB-blank

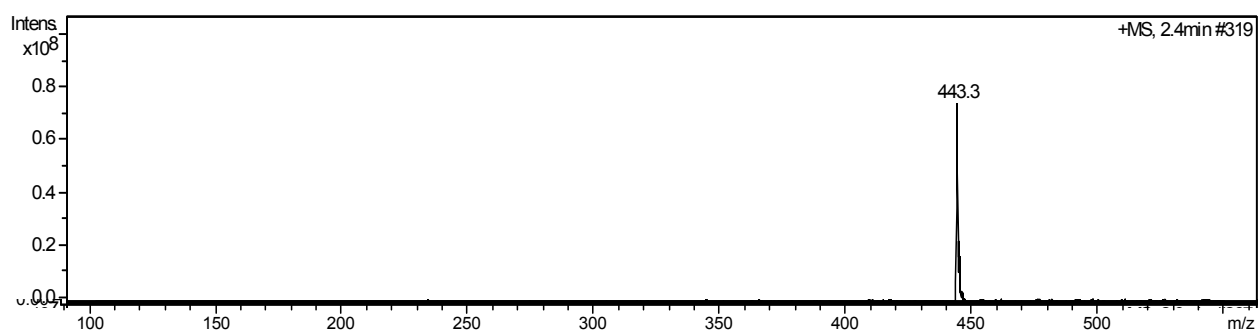

TiO<sub>2</sub> 120 min

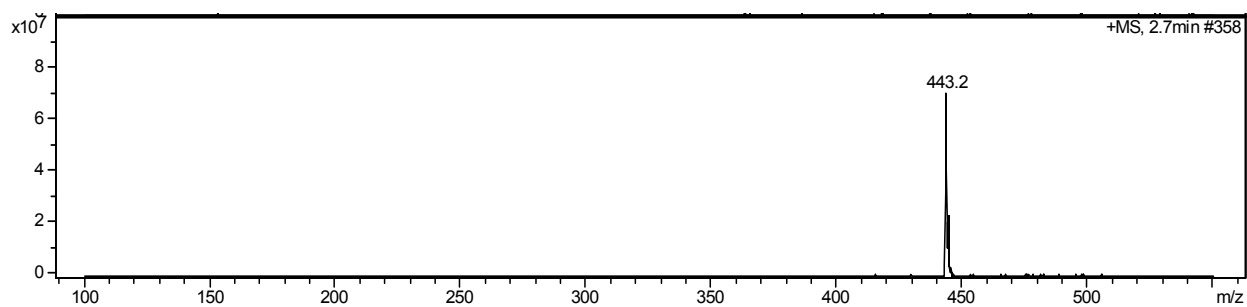

Fig. S7. TOC data of RhB aqueous solution after photodegradation for 2 hour.

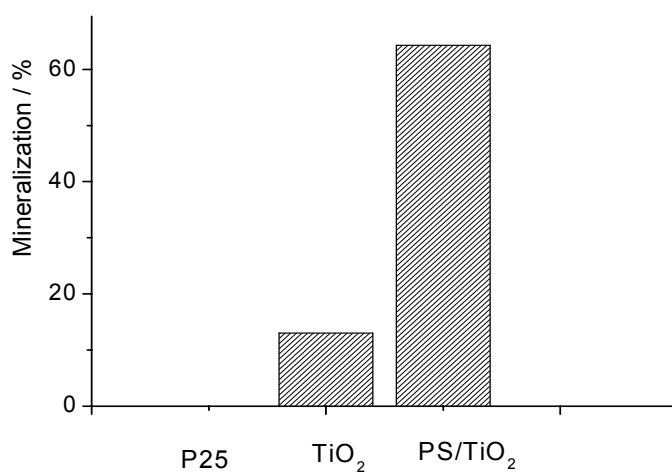

Supplement: b517744h.pdf [file b517744h.pdf]
